# Supplementary material for: The precise synthesis of twin-born Fe3O4/FeS/carbon nanosheets for high-rate lithium-ion batteries
Source: Royal Society of Chemistry journal article supplement (doi:10.1039/d1qm00153a), 2021-01-01
Supplement: d1qm00153a1.pdf [file d1qm00153a1.pdf]

## **Precise synthesis of twins-born Fe<sub>3</sub>O<sub>4</sub>/FeS/Carbon nanosheet for high-rate lithium-ion battery**

Linlin Ma<sup>a</sup>, Baoxiu Hou<sup>a</sup>, Ningzhao Shang<sup>a</sup>, Shuaihua Zhang<sup>a</sup>, Chun Wang<sup>a</sup>, Lingbo Zong<sup>d</sup>,  
Jianjun Song<sup>c\*</sup>, Jiangyan Wang<sup>b\*</sup>, Xiaoxian Zhao<sup>a\*</sup>

<sup>a</sup> *Department of Chemistry, College of Science, Hebei Agricultural University, Baoding, 071001, China.*

<sup>b</sup> *State Key Laboratory of Biochemical Engineering, Institute of Process Engineering, Chinese Academy of Sciences, No. 1, Beierjie, Zhongguancun, Beijing, 100190, P. R. China.*

<sup>c</sup> *College of Physics, Qingdao University, Qingdao 266071, P. R. China.*

<sup>d</sup> *College of Chemistry and Molecular Engineering, Qingdao University of Science and Technology, Qingdao 266042, China.*

E-mail: [lxzhxx@hebau.edu.cn](mailto:lxzhxx@hebau.edu.cn) (X, Zhao); [jywang@ipe.ac.cn](mailto:jywang@ipe.ac.cn) (J, Wang); [jianjun.song@qdu.edu.cn](mailto:jianjun.song@qdu.edu.cn)  
(J, Song)

### Supporting Information Caption

**Figure S1:** The SEM images of MIL-88b(Fe) with different citric acid added (a, no citric acid; b, 0.08 g; c, 0.05 g), and the TEM images of MIL-88b(Fe) with 0.05 g citric acid (d).

**Figure S2:** The SEM images of TB-FeOSC with different structure based on MIL-88b(Fe) precursor with different citric acid (a, no citric acid; b, 0.05 g citric acid; c, 0.08 g citric acid).

**Figure S3:** The SEM images and TEM images of TB-FeOSC-NS.

**Figure S4:** TG of TB-FeOSC-NS.

**Figure S5:** The SAED images of TB-FeOSC-NS.

**Figure S6:** The XRD refinement of TB-FeOSC with different temperature (a, TB-FeOSC-600; b, TB-FeOSC-NS; c, TB-FeOSC-800; d, TB-FeOSC-900) and crystal structure of  $\text{Fe}_3\text{O}_4$  (e) and FeS (f).

**Figure S7:** The SEM images of TB-FeOSC with different structure (a, TB-FeOSC-600; b, TB-FeOSC-NS; c, TB-FeOSC-800; d, TB-FeOSC-900) and a scheme to synthesize TB-FeOSC at different calcination temperature (e).

**Figure S8:** The determination of tap density of TB-FeOSC-NS (a, volume after testing; b, quality after testing).

**Figure S9:** The first three CV curves of TB-FeOSC based on MIL-88b(Fe) precursor with different citric acid (a, TB-FeOSC-P; b, TB-FeOSC-NS; c, TB-FeOSC-A).

**Figure S10:** The galvanostatic discharge/charge curves at current densities of 0.5, 1, 2, 5, 10, 20 and 0.5 A  $\text{g}^{-1}$  of TB-FeOSC based on MIL-88b(Fe) precursor with different citric acid (a, TB-FeOSC-P; b, TB-FeOSC-NS; c, TB-FeOSC-A).

**Figure S11:** The BET of TB-FeOSC with different citric acid (a) and with different temperature (b).

**Figure S12:** The Pore size of TB-FeOSC with different citric acid (a) and with different temperature (b).

**Figure S13:** The CV curves at different scan rates of 0.5, 1.0, 2.0, 3.0, 4.0 and 5.0  $\text{mV s}^{-1}$  of TB-FeOSC based on MIL-88b(Fe) precursor with different citric acid (a, TB-FeOSC-P; b, TB-FeOSC-NS; c, TB-FeOSC-A).

**Figure S14:** The calculation results for capacitive contribution of TB-FeOSC adjusted by citric acid. (a, TB-FeOSC-P; b, TB-FeOSC-NS; c, TB-FeOSC-A).

**Figure S15:** The first three CV curves of TB-FeOSC calcined at different temperature. a, TB-FeOSC-600; b, TB-FeOSC-NS; c, TB-FeOSC-800; d, TB-FeOSC-900.

**Figure S16:** The galvanostatic discharge/charge curves at current densities of 0.5, 1, 2, 5, 10, 20 and 0.5 A g<sup>-1</sup> of TB-FeOSC calcined at different temperature. a, TB-FeOSC-600; b, TB-FeOSC-NS; c, TB-FeOSC-800; d, TB-FeOSC-900.

**Figure S17:** The CV curves at different scan rates of 0.5, 1.0, 2.0, 3.0, 4.0 and 5.0 mV s<sup>-1</sup> of TB-FeOSC-NS calcined at different temperature. a, TB-FeOSC-600; b, TB-FeOSC-NS; c, TB-FeOSC-800; d, TB-FeOSC-900.

**Figure S18:** The calculation results for capacitive contribution of TB-FeOSC-NS at different temperature. (a, TB-FeOSC-600; b, TB-FeOSC-NS; c, TB-FeOSC-800; d, TB-FeOSC-900).

**Figure S19:** The structure of TB-FeOSC after a long circulation at a current density of 1 A g<sup>-1</sup> (a1, TB-FeOSC-600; a2, TB-FeOSC-NS; a3, TB-FeOSC-800; a4, TB-FeOSC-900) and 5 A g<sup>-1</sup> (a5 and a6); the S2p (b) and Fe2p (c) XPS high-resolution curves of TB-FeOSC; the XRD analysis of TB-FeOSC during circulation (d); the separator of TB-FeOSC a current density of 1 A g<sup>-1</sup> (e1, TB-FeOSC-600; e2, TB-FeOSC-NS; e3, TB-FeOSC-800; e4, TB-FeOSC-900) and 5 A g<sup>-1</sup> (e5).

**Figure S20:** The morphological and structural change of the electrode during the discharge/charge cycles.

**Figure S21:** The adsorption experiment of TB-FeOSC-600, TB-FeOSC-NS, TB-FeOSC-800 and TB-FeOSC-900.

**Table S1:** The crystal parameters and ratio of Fe<sub>3</sub>O<sub>4</sub>/FeS of samples treated at different temperature.

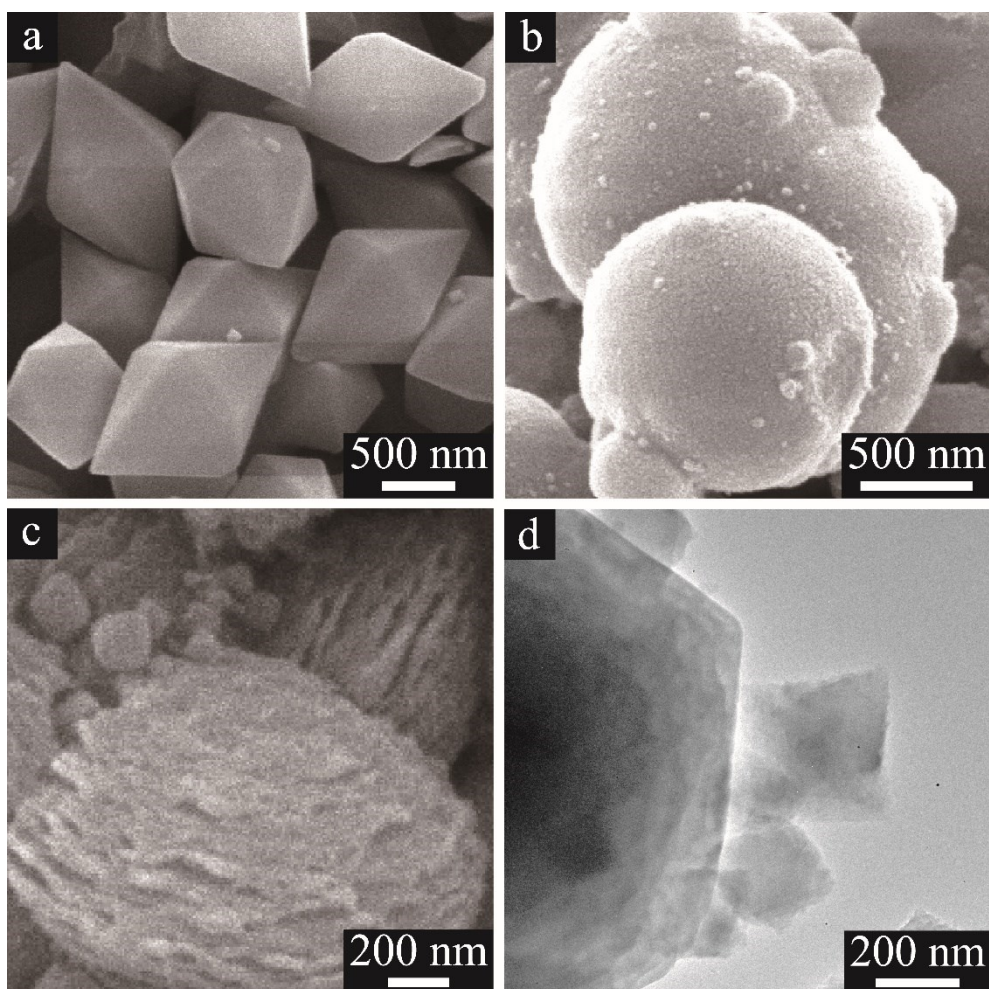

**Figure S1.** The SEM images of MIL-88b(Fe) with different citric acid added (a, no citric acid; b, 0.08 g; c, 0.05 g), and the TEM images of MIL-88b(Fe) with 0.05 g citric acid (d).

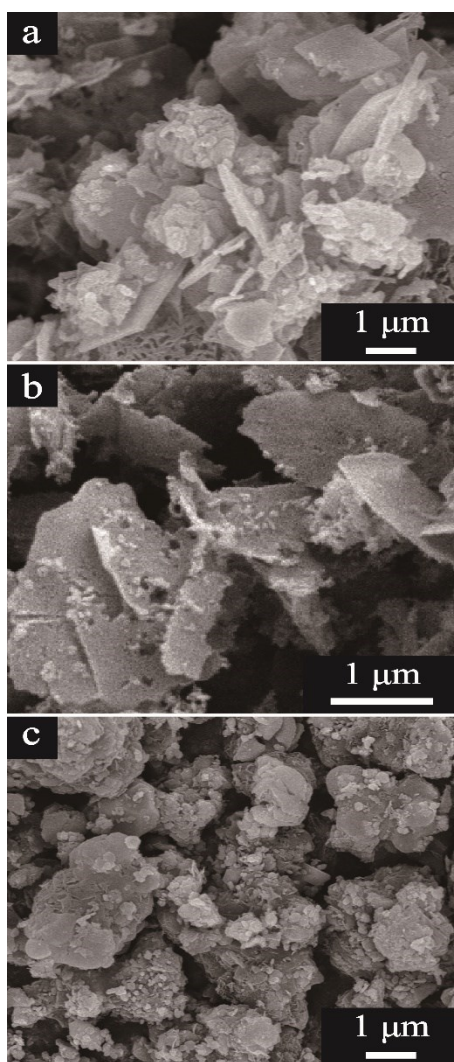

**Figure S2.** The SEM images of TB-FeOSC with different structure based on MIL-88b(Fe) precursor with different citric acid (a, no citric acid; b, 0.05 g citric acid; c, 0.08 g citric acid).

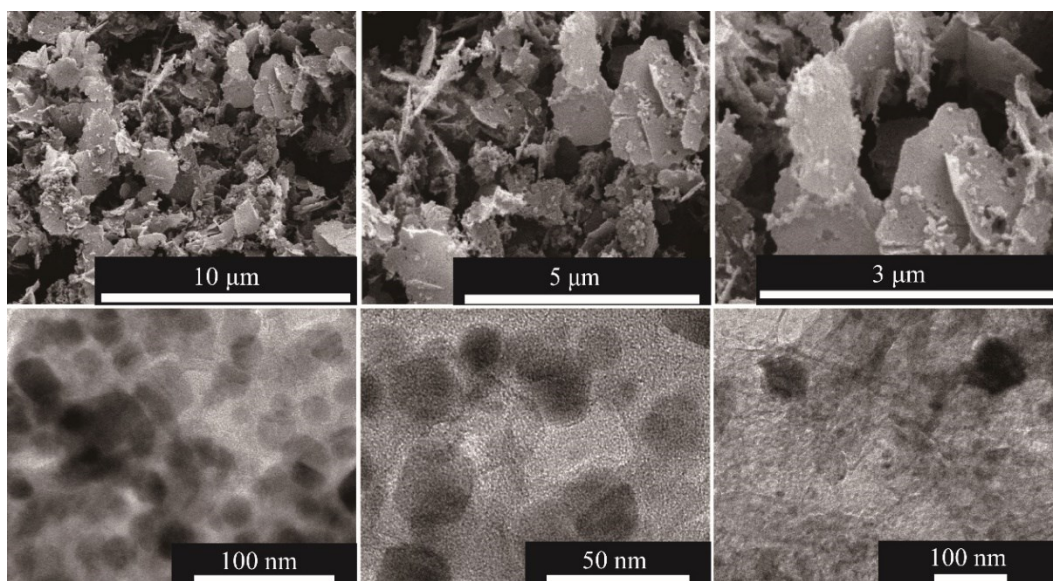

**Figure S3.** The SEM images and TEM images of TB-FeOSC-NS.

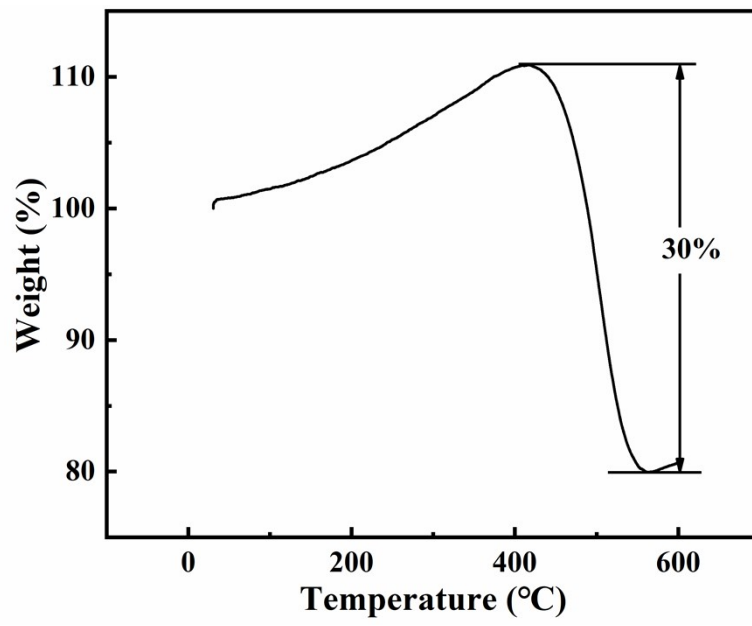

Figure S4. TG of TB-FeOSC-NS.



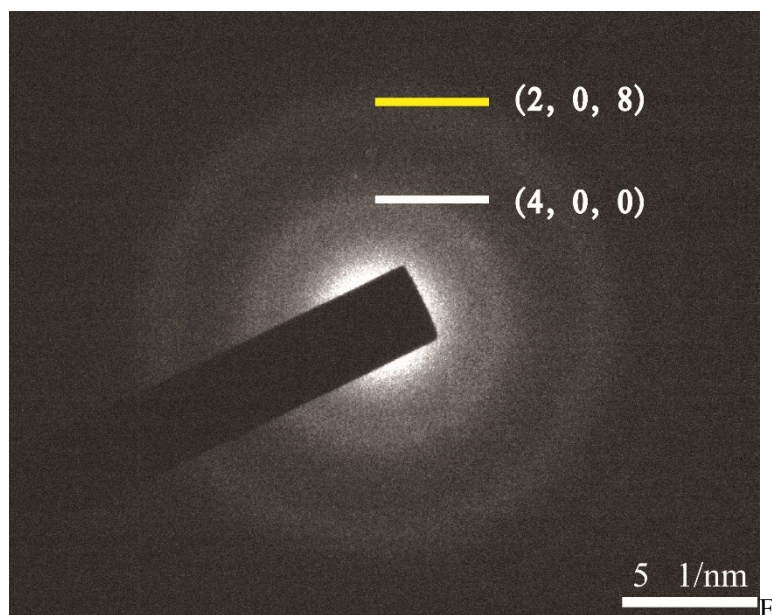

**Figure S5.** The SAED images of TB-FeOSC-NS.



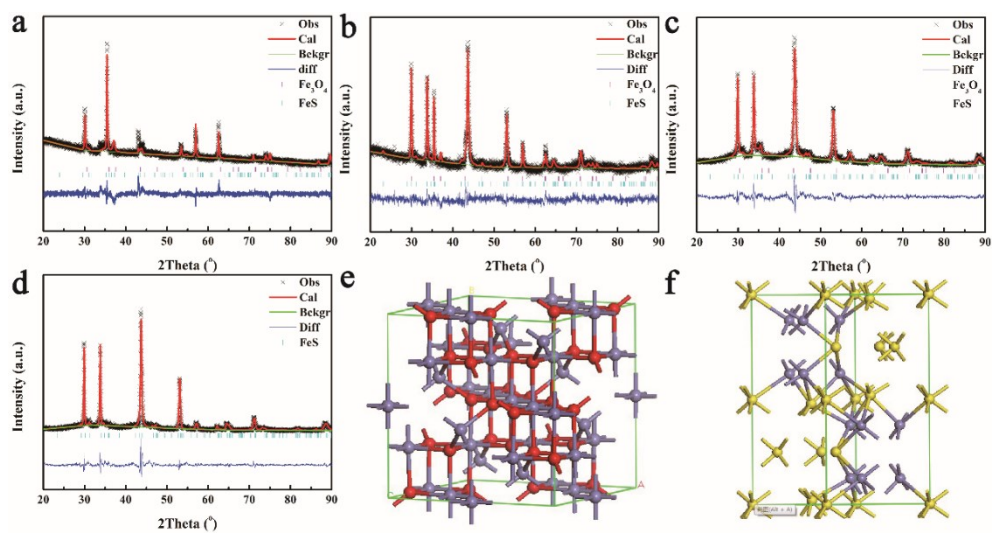

**Figure S6.** The XRD refinement of TB-FeOSC with different temperature (a, TB-FeOSC-600; b, TB-FeOSC-NS; c, TB-FeOSC-800; d, TB-FeOSC-900) and crystal structure of Fe<sub>3</sub>O<sub>4</sub> (e) and FeS (f).

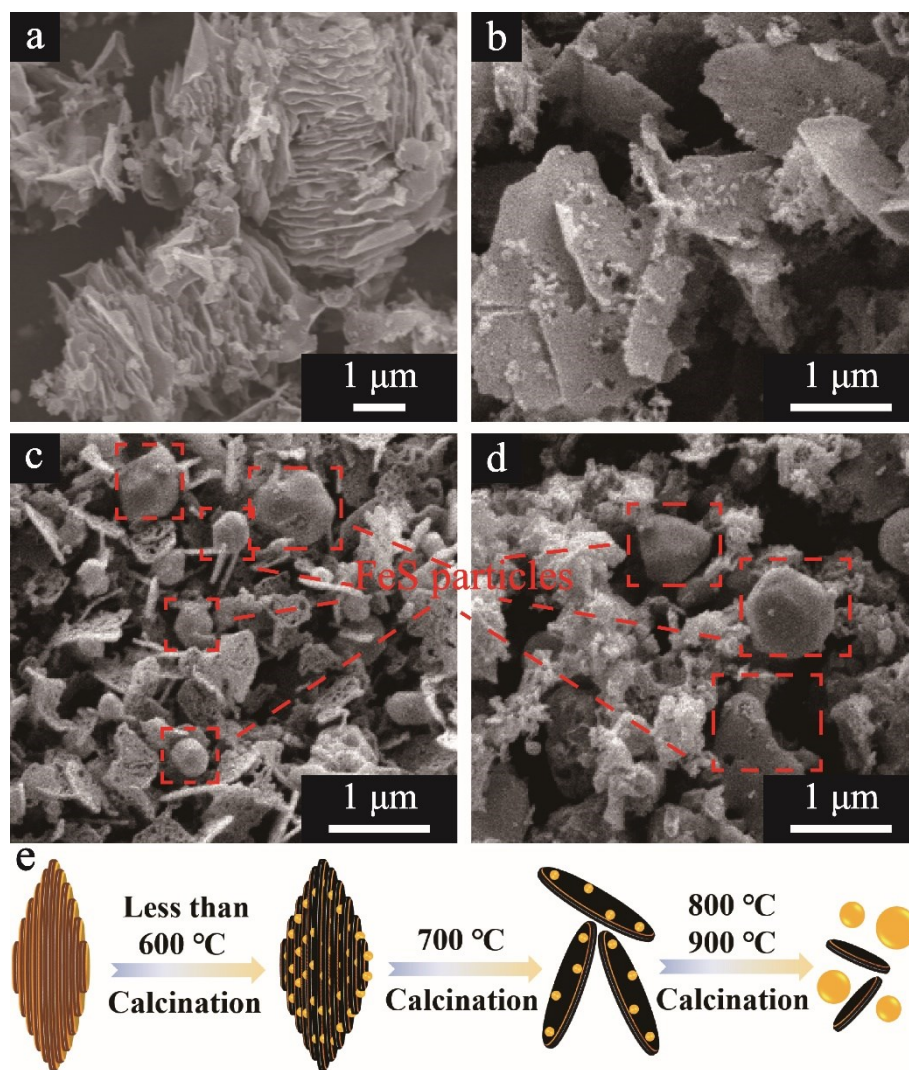

**Figure S7.** The SEM images of TB-FeOSC with different structure (a, TB-FeOSC-600; b, TB-FeOSC-NS; c, TB-FeOSC-800; d, TB-FeOSC-900) and a scheme to synthesize TB-FeOSC at different calcination temperature (e).

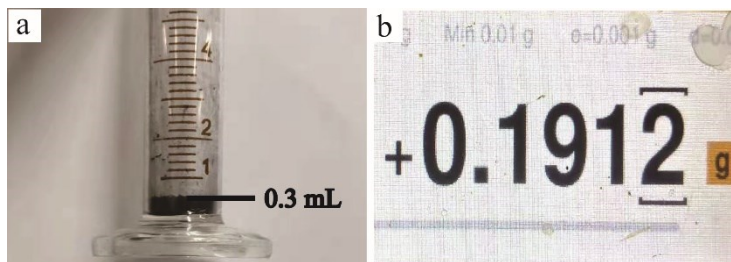

**Figure S8.** The determination of tap density of TB-FeOSC-NS (a, volume after testing; b, quality after testing).

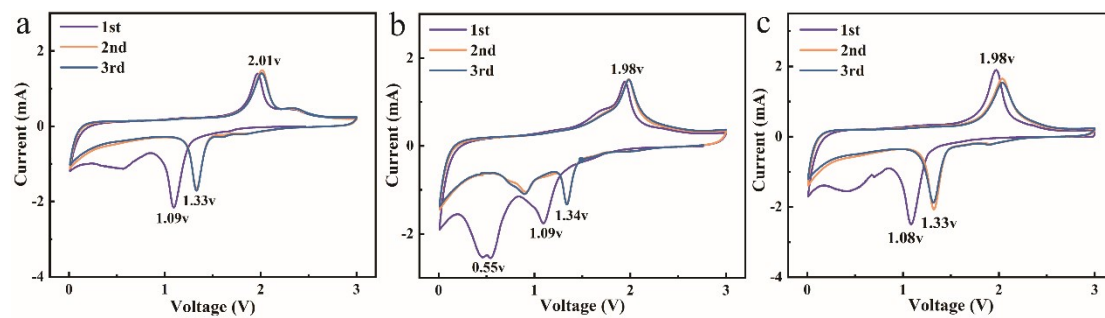

**Figure S9.** The first three CV curves of TB-FeOSC based on MIL-88b(Fe) precursor with different citric acid (a, TB-FeOSC-P; b, TB-FeOSC-NS; c, TB-FeOSC-A).

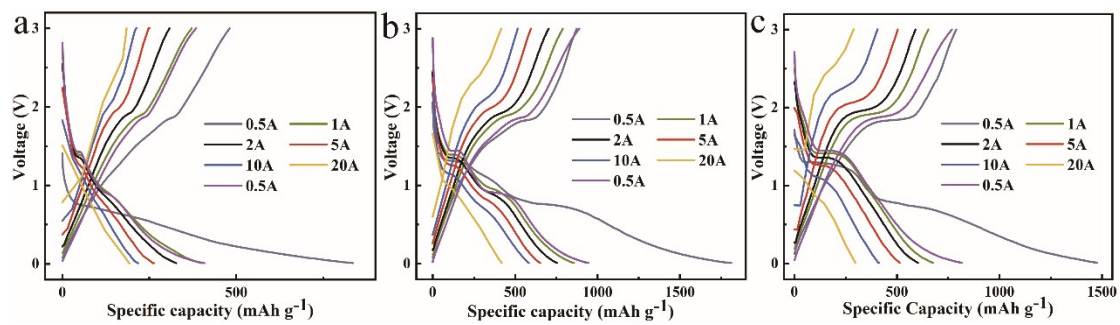

**Figure S10.** The galvanostatic discharge/charge curves at current densities of 0.5, 1, 2, 5, 10, 20 and 0.5 A g<sup>-1</sup> of TB-FeOSC based on MIL-88b(Fe) precursor with different citric acid (a, TB-FeOSC-P; b, TB-FeOSC-NS; c, TB-FeOSC-A).

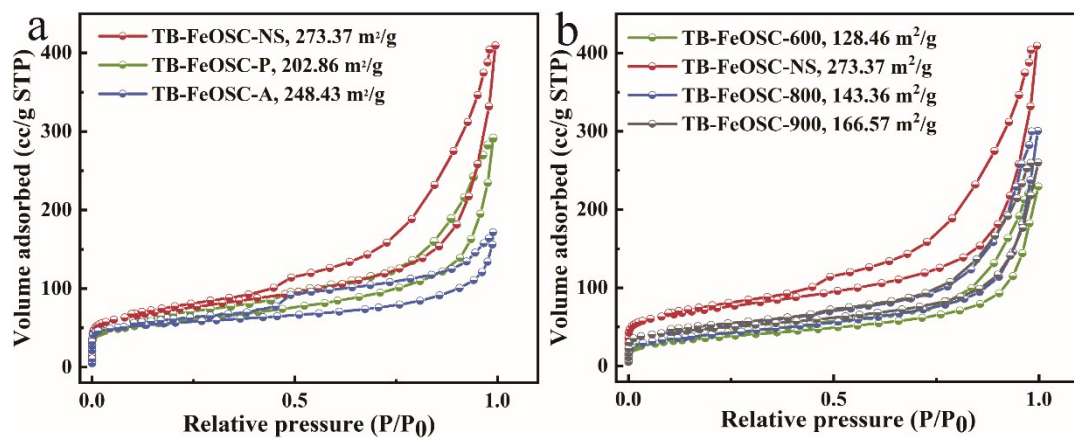

**Figure S11.** The BET of TB-FeOSC with different citric acid (a) and with different temperature (b).

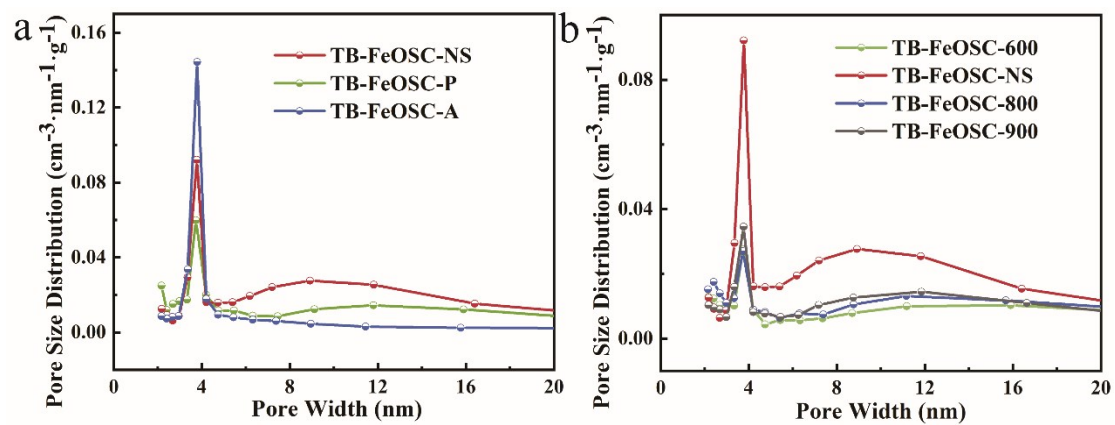

**Figure S12.** The pores distribution of TB-FeOSC with different citric acid (a) and different temperature (b).



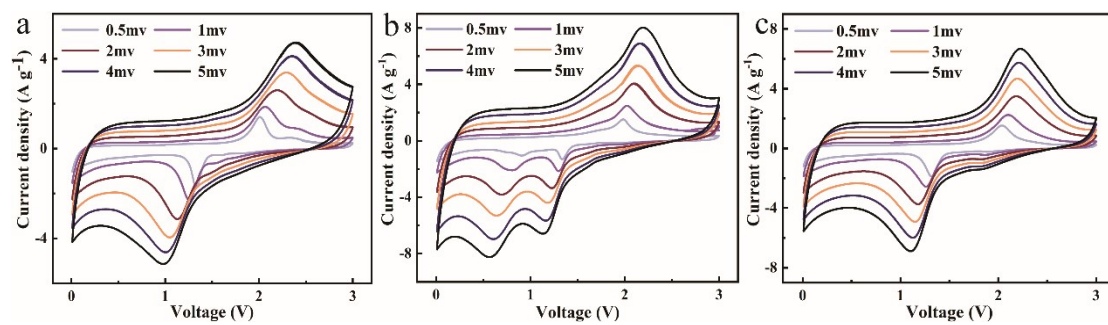

**Figure S13.** The CV curves at different scan rates of 0.5, 1.0, 2.0, 3.0, 4.0 and 5.0  $\text{mV s}^{-1}$  of TB-FeOSC based on MIL-88b(Fe) precursor with different citric acid (a, TB-FeOSC-P; b, TB-FeOSC-NS; c, TB-FeOSC-A).

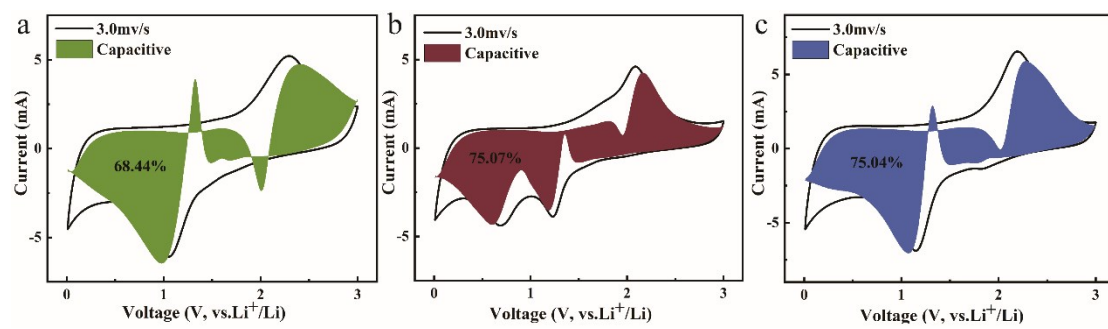

**Figure S14.** The calculation results for capacitive contribution of TB-FeOSC adjusted by citric acid. (a, TB-FeOSC-P; b, TB-FeOSC-NS; c, TB-FeOSC-A).

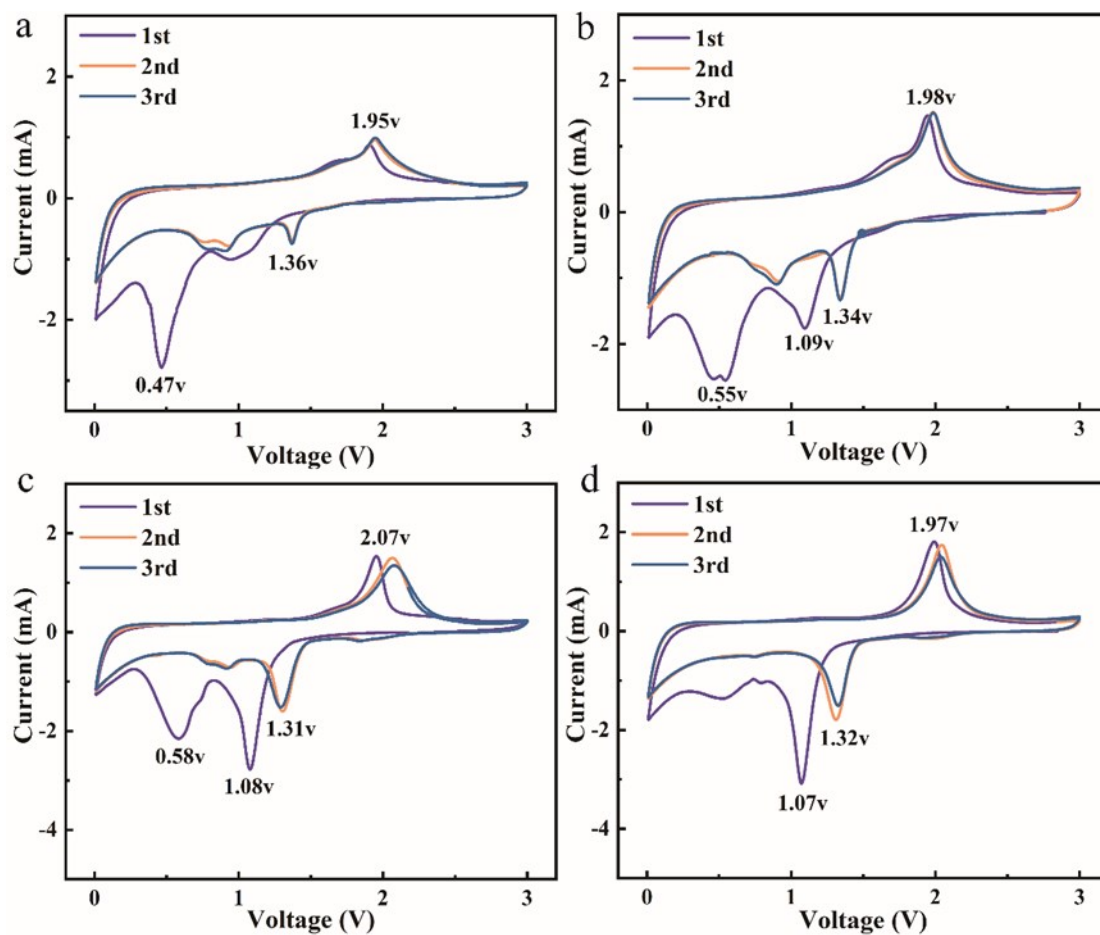

**Figure S15.** The first three CV curves of TB-FeOSC calcined at different temperature. a, TB-FeOSC-600; b, TB-FeOSC-NS; c, TB-FeOSC-800; d, TB-FeOSC-900.

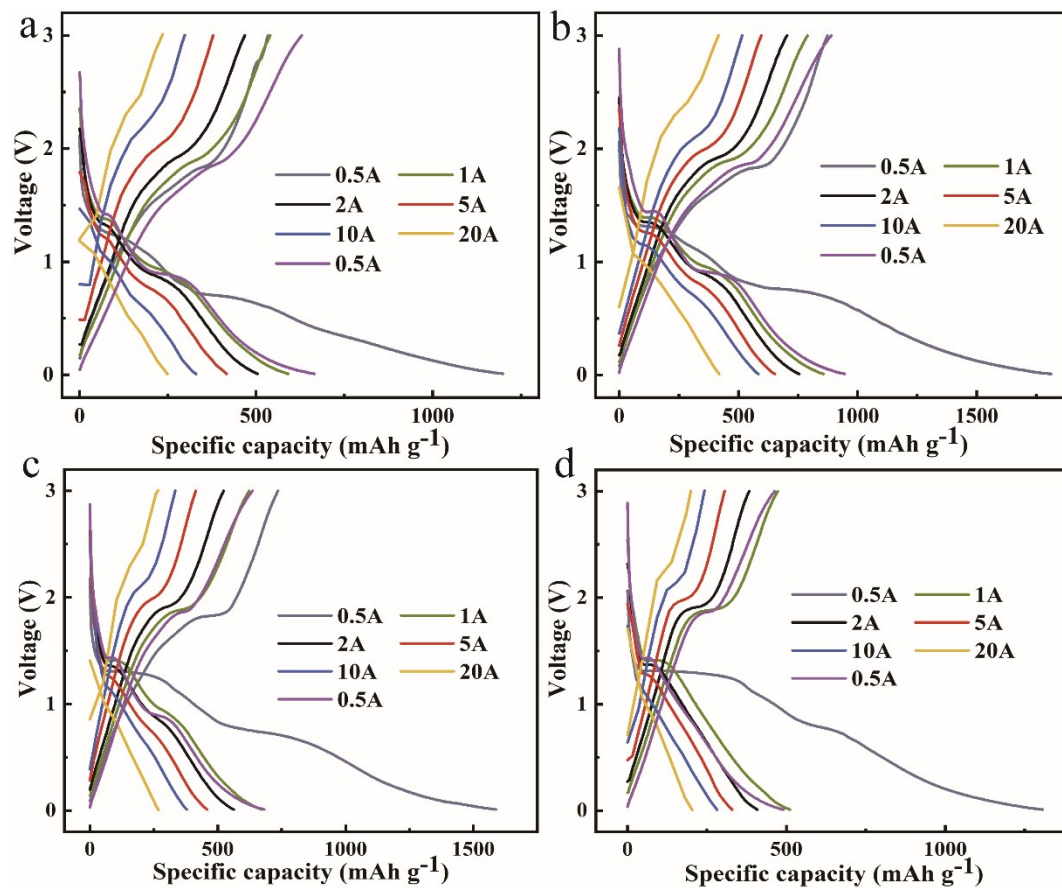

**Figure S16.** The galvanostatic discharge/charge curves at current densities of 0.5, 1, 2, 5, 10, 20 and 0.5 A g<sup>-1</sup> of TB-FeOSC calcined at different temperature. a, TB-FeOSC-600; b, TB-FeOSC-NS; c, TB-FeOSC-800; d, TB-FeOSC-900.

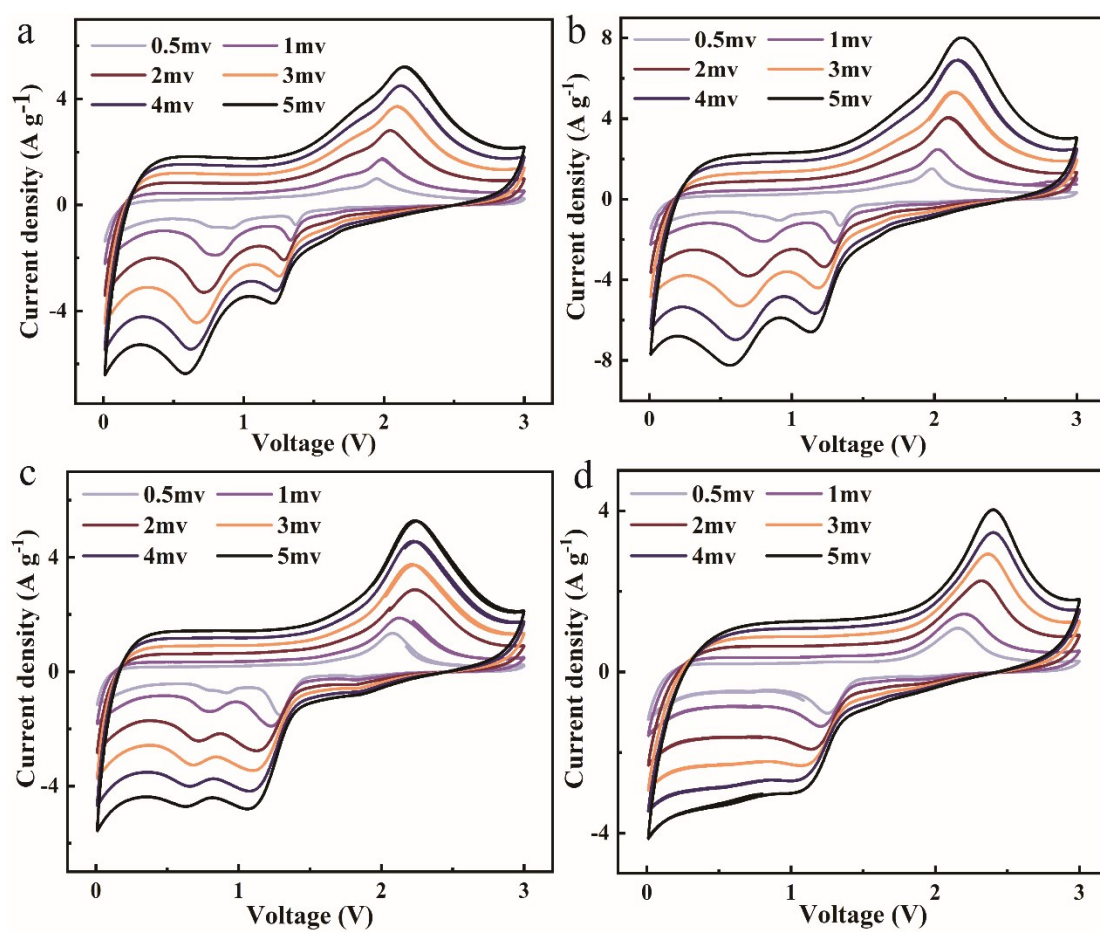

**Figure S17.** The CV curves at different scan rates of 0.5, 1.0, 2.0, 3.0, 4.0 and 5.0 mV s<sup>-1</sup> of TB-FeOSC-NS calcined at different temperature. a, TB-FeOSC-600; b, TB-FeOSC-NS; c, TB-FeOSC-800; d, TB-FeOSC-900.

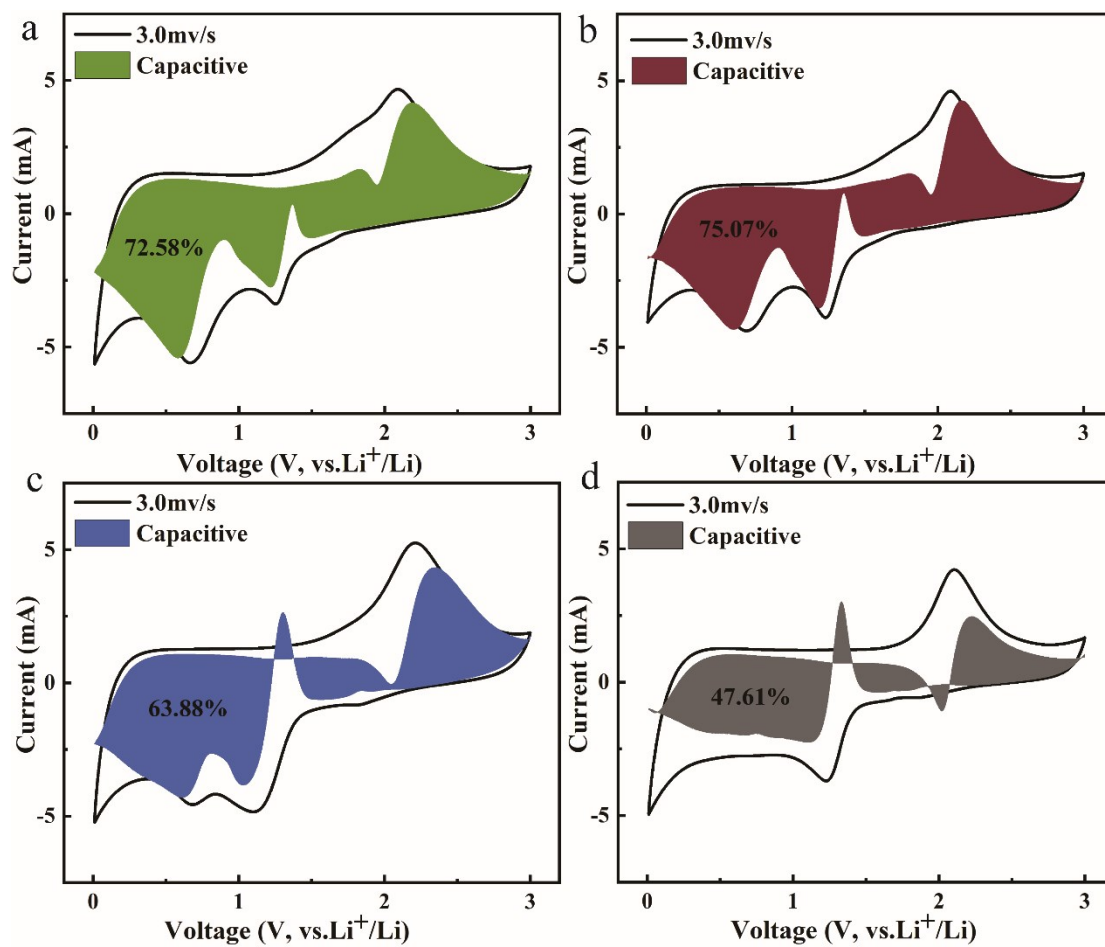

**Figure S18.** The calculation results for capacitive contribution of TB-FeOSC-NS at different temperature. (a, TB-FeOSC-600; b, TB-FeOSC-NS; c, TB-FeOSC-800; d, TB-FeOSC-900).

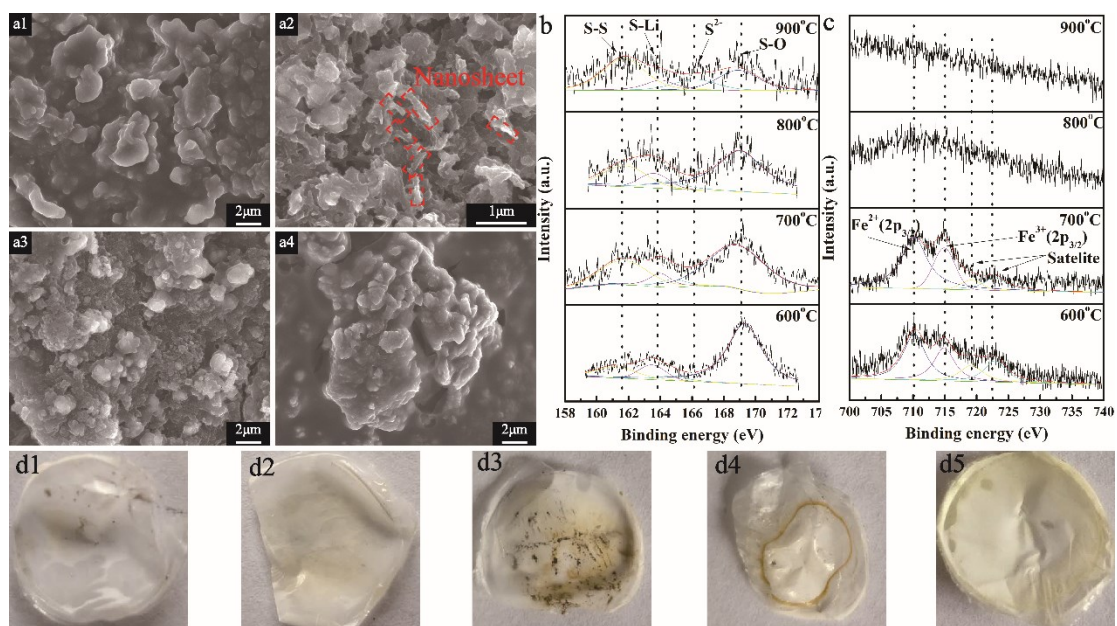

**Figure S19.** The structure of TB-FeOSC after a long circulation at a current density of  $1 \text{ A g}^{-1}$  (a1, TB-FeOSC-600; a2, TB-FeOSC-NS; a3, TB-FeOSC-800; a4, TB-FeOSC-900); the S2p (b) and Fe2p (c) XPS high-resolution curves of TB-FeOSC; the separator of TB-FeOSC at a current density of  $1 \text{ A g}^{-1}$  (d1, TB-FeOSC-600; d2, TB-FeOSC-NS; d3, TB-FeOSC-800; d4, TB-FeOSC-900) and  $5 \text{ A g}^{-1}$  (d5).



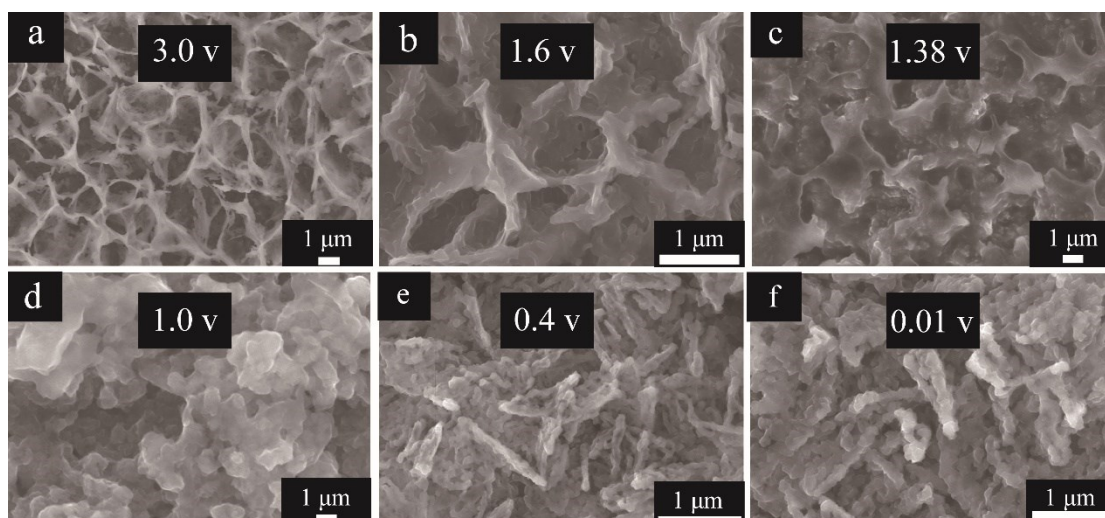

**Figure S20.** The morphological and structural change of the electrode during the discharge/charge cycles.

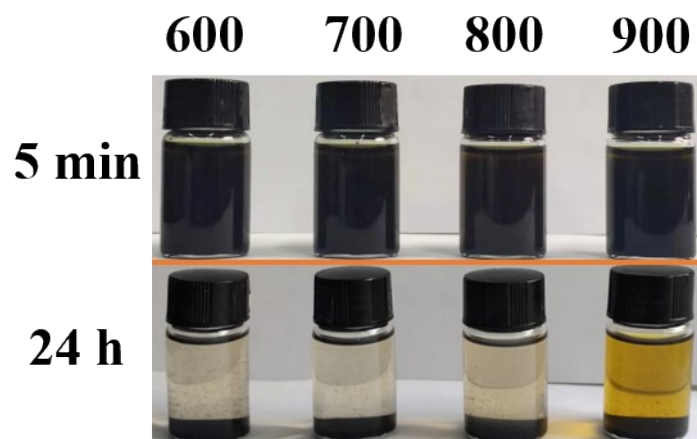

**Figure S21.** The adsorption experiment of TB-FeOSC-600, TB-FeOSC-NS, TB-FeOSC-800 and TB-FeOSC-900.

The TB-FeOSC-600, TB-FeOSC-NS, TB-FeOSC-800 and TB-FeOSC-900 with 20 mg were put into a bottle containing 28  $\mu\text{l}$   $\text{Li}_2\text{S}_6$  solution of 1,3-dioxolane (DOL)/1,2-dimethoxyethane (DME) (1:1 by volume). 5 min later, all the samples were black. After 24 h later, the samples of 600  $^\circ\text{C}$ , 700  $^\circ\text{C}$  were colorless, accompanying with light yellow of 800  $^\circ\text{C}$  sample, only the sample of 900  $^\circ\text{C}$  was yellow. In conclusion, the adsorption of samples treated at 600  $^\circ\text{C}$  and 700  $^\circ\text{C}$  on  $\text{Li}_2\text{S}_6$  is stronger than 800  $^\circ\text{C}$  and 900  $^\circ\text{C}$ , which further proves the stronger interaction of TB-FeOSC-NS with lithium polysulfide.

**Table S1** The crystal parameters and ratio of Fe<sub>3</sub>O<sub>4</sub>/FeS of samples treated at different

| Temperature                                  | 600 °C                         |        | 700 °C                         |        | 800 °C                         |        | 900 °C                         |        |
|----------------------------------------------|--------------------------------|--------|--------------------------------|--------|--------------------------------|--------|--------------------------------|--------|
|                                              | Fe <sub>3</sub> O <sub>4</sub> | FeS    |
| a                                            | 8.4072                         | 5.7623 | 8.4117                         | 5.9814 | 8.3465                         | 5.9802 | /                              | 5.9654 |
| b                                            | 8.4072                         | 5.7623 | 8.4117                         | 5.9814 | 8.3465                         | 5.9802 | /                              | 5.9654 |
| c                                            | 8.4072                         | 11.721 | 8.4117                         | 11.528 | 8.3465                         | 11.491 | /                              | 11.468 |
| Ratio of Fe <sub>3</sub> O <sub>4</sub> /FeS | 1.0185/0.4334                  |        | 1.5183/6.2594                  |        | 1.9334/36.598                  |        | 0/1                            |        |

temperature

## Reference

- [1] G. A. Muller, J. B. Cook, H. S. Kim, S. H. Tolbert and B. Dunn, High performance pseudo capacitor based on 2D layered metal chalcogenide nanocrystals, *Nano Lett*, 2015, **15**, 1911-1917.
- [2] H. Lindström, S. Sven, S. Anita, R. Håkan, H. Johan, H. Anders and L. Sten-Eric, Li<sup>+</sup> ion insertion in TiO<sub>2</sub> (Anatase). 2. voltammetry on nanoporous films, *J. Phys. Chem. B*, 1997, **101**, 7717-7722.
- [3] S. Fu, J. Ni, Y. Xu, Q. Zhang, and L. Li, Hydrogenation driven conductive Na<sub>2</sub>Ti<sub>3</sub>O<sub>7</sub> nanoarrays as robust binder-free anodes for sodium-ion batteries, *Nano Lett*, 2016, **16**, 4544-4551.
- [4] T. Brezesinski, J. Wang, S.H. Tolbert and B. Dunn, Ordered mesoporous Alpha-MoO<sub>3</sub> with iso-oriented nanocrystalline walls for thin-film pseudo capacitors, *Nat. Mater*, 2010, **9**, 146-151.
